# Supplementary material for: Atomistic insight into the oxidation of monolayer transition metal dichalcogenides: from structures to electronic properties
Source: Royal Society of Chemistry journal article supplement (doi:10.1039/c4ra17320a), 2015-01-01
Supplement: c4ra17320a1.pdf [file c4ra17320a1.pdf]

## SUPPORTING INFORMATION

### **Atomistic insight into the oxidation of monolayer transition metal dichalcogenides: from structures to electronic properties**

*Hongsheng Liu, Nannan Han, Jijun Zhao\**

Key Laboratory of Materials Modification by Laser, Ion and Electron Beams (Dalian University  
of Technology), Ministry of Education, Dalian 116024, China

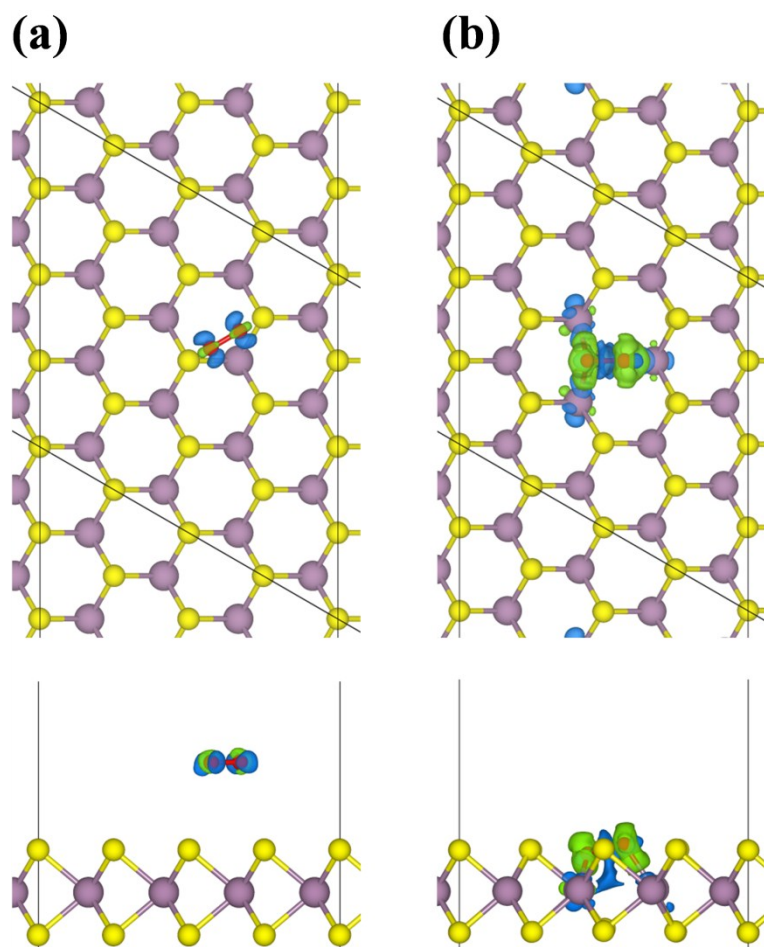

**Figure S1.** Charge density difference for O<sub>2</sub> adsorbed on (a) perfect and (b) defective MoS<sub>2</sub> monolayer. The iso-surface for electron density is  $2 \times 10^{-4} \text{ e}/\text{\AA}^3$  for (a) and  $6 \times 10^{-3} \text{ e}/\text{\AA}^3$  for (b). Green is charge accumulation and blue is charge depletion. The charge density difference is calculated as  $\text{Charge}_{\text{total}} - \text{Charge}_{\text{O}_2} - \text{Charge}_{\text{sub}}$ , where  $\text{Charge}_{\text{total}}$  is the total charge density of the systems,  $\text{Charge}_{\text{O}_2}$  is the charge density of O<sub>2</sub> and  $\text{Charge}_{\text{sub}}$  is the charge density of perfect or defective MoS<sub>2</sub> monolayer.

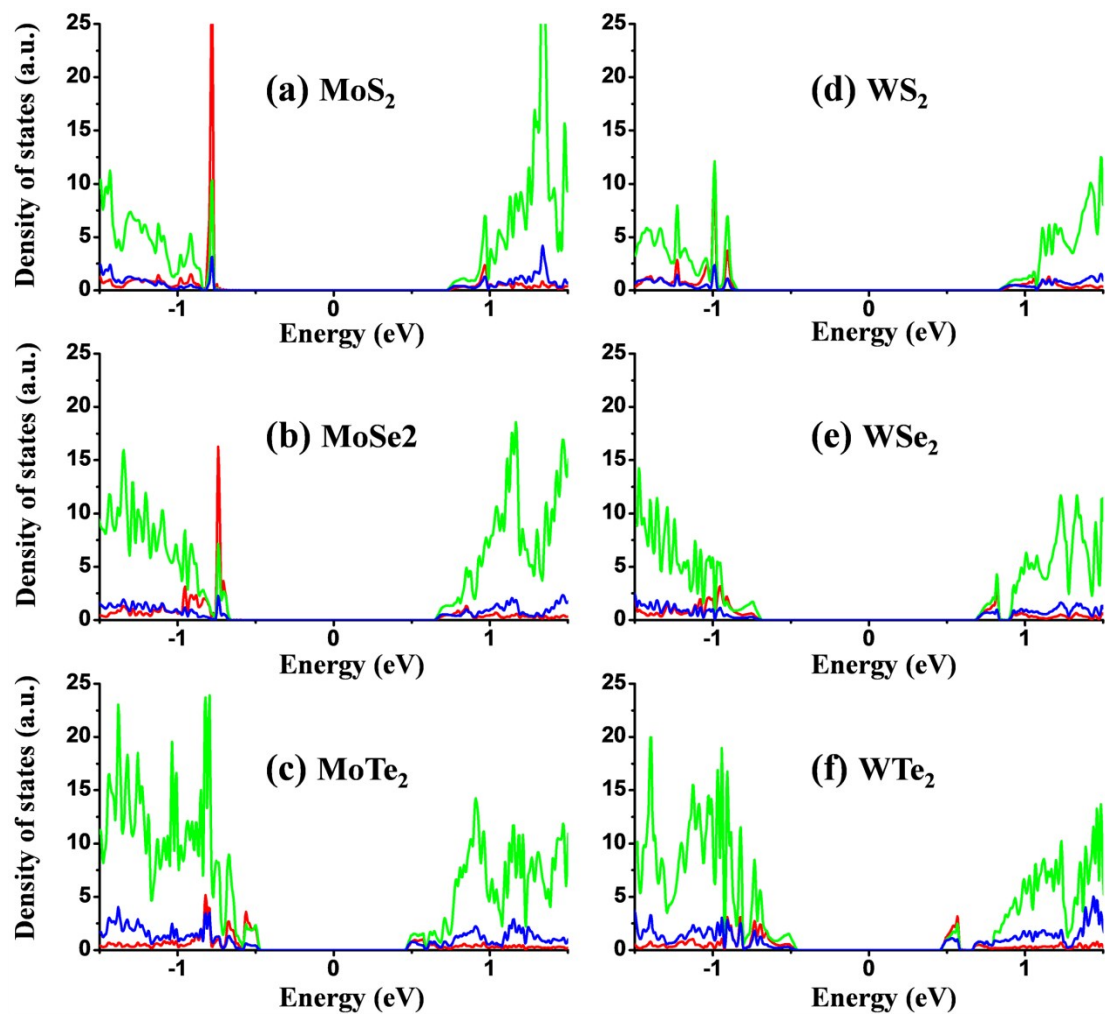

**Figure S2.** Partial density of states (PDOS) for all the six defective TMD monolayers with  $\text{O}_2$  adsorption at vacancy sites. Red lines represent states from  $\text{O}_2$ . Green lines represent states from chalcogen (S, Se or Te). Blue lines represent states from transition metal atoms.
